1 **Impacts of school closure due to COVID-19 on the mobility trend of Japanese citizens**

2 Nguyen Hai Nam<sup>1,2,3,⊕</sup>, Anh PN. Nguyen<sup>3,4,⊕</sup>, Bao-Tran Do Le<sup>3,5</sup>, Abdelrahman Gamil Gad<sup>3,6</sup>,  
3 Abdelrahman Sherif Mohamed Abdelnaeim Abdalla<sup>3,7</sup>, Adnan Safi<sup>3,8</sup>, Anh Gia Pham<sup>3,9</sup>, Vo Duc  
4 Khanh<sup>10</sup>, Nguyen Tien Huy<sup>3,11,\*</sup>

5 <sup>1</sup> Graduate School of Medicine, Kyoto University, 606-8501, Kyoto, Japan.

6 <sup>2</sup> Harvard Medical School, Global Clinical Scholars Research Training Program, Boston, MA  
7 02115, United States.

8 <sup>3</sup> Online Research Club, <http://www.onlinersearchclub.org>, Nagasaki 852-8523, Japan.

9 <sup>4</sup> Department of Biology, Concordia College, Moorhead, MN 56562, United States.

10 <sup>5</sup> Department of Biochemistry, University of California, Los Angeles, Los Angeles, CA 90095-  
11 1569, United States.

12 <sup>6</sup> Faculty of Medicine, Ain Shams University, Cairo, Egypt.

13 <sup>7</sup> Faculty of Medicine, Minia University, Minia Governorate, Egypt.

14 <sup>8</sup> Department of Medicine and Surgery, Nishtar Medical University and Hospital, Multan,  
15 Pakistan.

16 <sup>9</sup> Faculty of Medicine, University of Medicine and Pharmacy at Ho Chi Minh City, Ho Chi Minh  
17 City, 70000, Vietnam.

18 <sup>10</sup> University of Science, Vietnam National University - Ho Chi Minh City, Ho Chi Minh City,  
19 70000, Vietnam.

20 <sup>11</sup> School of Tropical Medicine and Global Health, Nagasaki University, Nagasaki 852-8523,  
21 Japan.

22 ⊕ These authors have contributed equally to this work.

23 **Corresponding author:**

24 *Nguyen Tien Huy, M.D, Ph.D, School of Tropical Medicine and Global Health, Nagasaki*  
25 *University, Nagasaki 852-8523, Japan. (E-Mail: [tienhuy@nagasaki-u.ac.jp](mailto:tienhuy@nagasaki-u.ac.jp))*

26 **E-mail of co-authors:**

27 *NHN: [nguyenhainam@kuhp.kyoto-u.ac.jp](mailto:nguyenhainam@kuhp.kyoto-u.ac.jp) (ORCID: 0000-0001-5184-6936)*

28 APNN: [anguyen3@cord.edu](mailto:anguyen3@cord.edu) (ORCID: 0000-0003-4519-8084)

29 BTDL: [baotrandole@g.ucla.edu](mailto:baotrandole@g.ucla.edu) (ORCID: 0000-0003-3233-8965)

30 AGG: [abdulrhman@gmail.com](mailto:abdulrhman@gmail.com) (ORCID: 0000-0002-4461-3517)

31 ASMAA: [Abdelrahman.sherif@protonmail.ch](mailto:Abdelrahman.sherif@protonmail.ch) (ORCID: 0000-0002-3616-3376)

32 AS: [adnansafi222@gmail.com](mailto:adnansafi222@gmail.com) (ORCID: 0000-0001-5356-481X)

33 AGP: [giaanh0710@gmail.com](mailto:giaanh0710@gmail.com) (ORCID: 0000-0001-7085-8668)

34 VDK: [khanh.voduc@gmail.com](mailto:khanh.voduc@gmail.com)

35 NTH: [tienhuy@nagasaki-u.ac.jp](mailto:tienhuy@nagasaki-u.ac.jp) (ORCID: 0000-0002-9543-9440)

36

37 Word count: 2205 words

38

### 39 **Abstract**

40 School closure was the only main control measure that Japan took into action from late February  
41 to late March in 2020. Accurate evaluation of how Japanese citizens responded to the impact of  
42 school closure remains a challenge. Data from the Google COVID-19 Community Mobility  
43 Report was used to analyze the mobility trend of Japanese citizens regarding six categories,  
44 including retail and recreation, grocery and pharmacy, parks, transit stations, workplace, and  
45 residential. The median percentage of mobility in all 47 prefectures of Japan was calculated  
46 during five periods of time, including one week before school closure, one week, two weeks,  
47 three weeks, and four weeks after school closure. There was a significant decline in the mobility  
48 trend of transit stations, grocery and pharmacy, parks, retail and recreation, and workplace at the  
49 moment after school closure compared to the prior period. Inversely, the mobility trend in  
50 staying at home remarkably increased following the implementation of school closure. Our study  
51 determined a significant change in the mobility trend of Japanese citizens before and after school  
52 closure. These data reflected the responsibility and the consciousness of Japanese citizens in  
53 mitigating COVID-19.

54

55 Keywords: school closure; COVID-19; mobility trend; Japanese; control measure

56

## 57 **Introduction**

58 Coronavirus is a large family of respiratory viruses that includes hundreds types of viruses<sup>1</sup>. A  
59 novel type of coronavirus, called severe acute respiratory syndrome coronavirus 2 (SARS-CoV-  
60 2), emerged in China in December 2019 and has caused coronavirus disease (COVID-19)  
61 worldwide<sup>1</sup>. On March 11<sup>th</sup>, 2020, the World Health Organization (WHO) declared the COVID-  
62 19 outbreak as a pandemic with 118,319 confirmed cases globally<sup>2</sup>. SARS-CoV-2 has a higher  
63 transmission rate than severe acute respiratory syndrome coronavirus (SARS-CoV) and middle  
64 east respiratory syndrome coronavirus (MERS-CoV), which are the other two coronaviruses  
65 causing previous epidemics<sup>3</sup>. Importantly, people mainly got COVID-19 by coming into close  
66 contact with another infected person<sup>4</sup>. Therefore, limiting social contacts is considered as a  
67 critical strategy to reduce the number of new COVID-19 cases.

68 Different control measures have been applied to control and mitigate the outbreak of COVID-19  
69 depending on the specific situation and policies of each country, such as locking down affected  
70 areas, imposing entry restrictions, canceling mass gathering events, and closing schools and  
71 workplaces. In the Community Mitigation Guidelines to Prevent Pandemic Influenza published  
72 by the Centers for Disease Control and Prevention (CDC) in April 2017, school closure was  
73 among one of the most critical strategies to maintain social distancing, thus helping mitigate the  
74 pandemics<sup>5</sup>. Since the transmission of influenza and COVID-19 share many similarities<sup>6,7</sup>,  
75 several guidelines to control influenza have been applied for COVID-19, including school  
76 closure<sup>8</sup>. As of March 18<sup>th</sup>, 2020, 107 countries had canceled schools to control the COVID-19  
77 pandemic<sup>9</sup>. Regarding Japan, from the end of February to the end of March, the main control  
78 measure that Japan took into action was to close schools nationwide. School closure started on  
79 March 2<sup>nd</sup> to limit the spread of the virus transmission when the country had 241 confirmed  
80 cases<sup>10</sup>. Specifically, elementary, junior high, and high schools were ordered to close until early  
81 April<sup>11</sup>.

82 Accurate evaluation of how Japanese citizens responded to the impact of school closure remains  
83 a challenge. Evidence of the effects of school closures on the behavioral changes of individuals  
84 over time is scarce. Since the individual data of Japanese citizens are confidential and highly  
85 protected, the COVID-19 Community Mobility Report from Google, which is based on the  
86 location history of GPS of users, remains an accessible and reliable database. Thus, in this paper,

87 we evaluated how school closure impacted the mobility of people living in Japan by using data  
88 from the COVID-19 Community Mobility Report of Japanese citizens.

89

## 90 **Methods**

### 91 *Database*

92 Google provides the Google COVID-19 Community Mobility Reports by using historical GPS  
93 data of users around the world<sup>12</sup>. Data from this report presented the percentage change of the  
94 mobility of Japanese citizens at several specific places, including retail and recreation, grocery  
95 and pharmacy, parks, transit stations, workplace, and residential.

96 These six categories recorded in the Google COVID-19 Community Mobility Reports were  
97 defined as (1) retail and recreation: the mobility trend in closed spaces such as restaurants, coffee  
98 shops, department stores, museums, libraries, and movie theaters; (2) grocery and pharmacy: the  
99 mobility trend in locations such as supermarkets, convenience stores, markets, and drugstores;  
100 (3) parks: the mobility trend in public areas such as parks, beaches, and harbours; (4) transit  
101 stations: the mobility trend in public transportation such as subways, railways, and buses; (5)  
102 workplace: the mobility trend in going to workplaces; and (6) residential: the mobility trend in  
103 staying at home.

### 104 *Data analysis*

105 We compared the percentage of mobility in six categories during five periods of time, including  
106 one week before school closure (from February 24<sup>th</sup> to March 1<sup>st</sup>), one week after school closure  
107 (from March 2<sup>nd</sup> to March 8<sup>th</sup>), two weeks after school closure (from March 2<sup>nd</sup> to March 15<sup>th</sup>),  
108 three weeks after school closure (from March 2<sup>nd</sup> to March 22<sup>th</sup>), and four weeks after school  
109 closure (from March 2<sup>nd</sup> to March 29<sup>th</sup>). Since the mobility report was a line graph, we used  
110 WebPlotDigitizer software to extract the percentage of these six categories in all 47 prefectures  
111 of Japan (<https://automeris.io/WebPlotDigitizer/>). The data obtained from the software was the  
112 percentage of the daily mobility of each prefecture. We then calculated the mobility percentage  
113 of a particular week by averaging the mobility percentage of all days during that period of time.  
114 After having the average mobility data in five periods of time of each prefecture, we calculated

115 the median of mobility in all 47 prefectures to have the national data. A box and whisker plot  
116 was plotted to interpret the changes of mobility in Japan from February 24<sup>th</sup> to March 29<sup>th</sup>.

### 117 *Statistical analysis*

118 Data were tested for deviations from a normal distribution within the groups using a Shapiro-  
119 Wilks test. The percentage of mobility in each category was expressed as the median with  
120 interquartile and was compared between each other using the Mann–Whitney test. Statistical  
121 significance was set at  $p < 0.05$ . All statistical analyses were performed by JMP version 12 (SAS  
122 Institute, Inc., Cary, NC, USA).

123

### 124 **Results**

125 The mobility of people living in Japan for retail and recreation witnessed a reduction after  
126 schools started closing nationwide. Compared to one week before school closure, the median  
127 (interquartile) mobility of retail and recreation significantly decreased at one week, two weeks,  
128 three weeks, and four weeks after school closure (1.6%(-4%;3.6%) vs. -8%(-10%;-5%); -6%(-  
129 7.8%;-3%); -3.8%(-6%;-1%); -3.8%(-5.7%;-2.7%). The lowest mobility percentage in this  
130 category was in period C (one week after school closure) with a reduction of 9.6% compared to  
131 one week before school closure. After the remarkable decline in period C, there was a trend to  
132 restore the mobility of retail and recreation, illustrated by the elevation in percentage of mobility  
133 in period D, E, and F (Figure 1).

134 In a similar manner as retail and recreation, the median (interquartile) mobility of Japanese  
135 citizens regarding grocery and pharmacy significantly decreased at period C, D, E, and F  
136 compared to period A (1.7%(0.4%;2.3%); 1.7%(0.7%;2.4%); 2%(1%;3%), and  
137 2.5%(1.5%;3.7%) vs. 7.4%(5.6%;8.2%)). Period C and D had the lowest percentage mobility of  
138 this category. A slight increase was identified after school closure since the moment of period D  
139 (Figure 2).

140 Regarding the mobility trend for parks in Japan, a notable depletion of the median (interquartile)  
141 mobility was observed at period C and D compared to period A (-6%(-11.5%;-3%); -3.2(-8.8%;-  
142 1%) vs. 4.6%(1.6%;5.3%)). However, at the moment of three and four weeks after school closure,

143 the mobility trend for parks restored as similar to that of one week before school closure (Figure  
144 3).

145 As expected, the percentage of transit stations experienced a decrease of nearly 10% over five  
146 weeks. The median (interquartile) mobility percentage of this category at period C, D, E, and F  
147 significantly reduced compared to period A (-21%(-25%;-19%); -20%(-24%;-17%); -17.7%(-  
148 22%;-14%), and -18.5%(-22%;-15%) vs. -9.8%(-13.5%;-6.9%)) (Figure 4).

149 In contrast, the median (interquartile) mobility of Japanese residents for the workplace rose  
150 nearly 5% in period B, C, and D. There was a significant increment of mobility in workplace at  
151 one week and two weeks after school closure compared to one week before school closure (-  
152 2.9%(-4%;-1.5%); -3%(-4.5%;-2.1%) vs. -7.7%(-13.5%;-4.4%)). Afterwards, the workplace  
153 mobility decreased in the next two weeks and there was no significant difference in the mobility  
154 percentage of the workplace when comparing period A to period E and F (Figure 5).

155 Concerning the mobility of residential, a trend of augmentation was exhibited since the date of  
156 school closure. The median (interquartile) mobility percentage of residential significantly  
157 increased in period C, D, E, and F compared to period A (3%(2.8%;4%); 3.1%(2.5%;3.9%);  
158 3.4%(2.8%;4%), and 3.6%(3%;4.5%) vs. 2.7%(2.5%;3.1%)) (Figure 6).

159

## 160 **Discussion**

161 Governments all over the world have taken several actions in order to prevent further spread of  
162 COVID-19 that started on December 31<sup>st</sup>, 2019<sup>1</sup>. During the pandemic, due to the unavailability  
163 of authorized vaccines and effective antiviral therapies, school closure was represented as one of  
164 the main control measures to mitigate the circulation of COVID-19 in many countries in the  
165 world even though its efficacy is still debatable<sup>9,13</sup>. Based on the evidence retrieved from the  
166 experience of the seasonal and pandemic influenza outbreaks<sup>6</sup>, the possibility of transmitting the  
167 disease via direct contacts<sup>14</sup>, and a universal consensus of COVID-19 control measures<sup>15</sup>, school  
168 closure in the era of COVID-19 is expected to limit the infection rate, especially within the  
169 vulnerable population such as students. School closure was applied in Japan from early March to  
170 June<sup>10</sup> in compliance with a government advisory and the measure consequently changed the  
171 daily activities of Japanese citizens. By using the COVID-19 Community Mobility Report from

172 Google to obtain the mobility data of 47 prefectures in Japan, our study determined a significant  
173 difference in mobility of Japanese citizens regarding six basic indicators, including retail and  
174 recreation, grocery and pharmacy, parks, transit stations, workplace, and residential at two  
175 periods of time which are before and after school closure.

176 At first, a significant reduction in the mobility of retail and recreation, grocery and pharmacy,  
177 and parks were detected at one week after school closure. Even though there was a trend of  
178 recovery, the rate of Japanese citizens involving in these two categories after application of  
179 school closure remarkably declined compared to the prior period. The worse situation of the  
180 outbreak as well as the implementation of school closure undeniably imposed a noticeable  
181 influence concerning daily activities of Japanese citizens. The volume of people going to routine  
182 locations (supermarkets, convenience stores, etc.), closed spaces (restaurants, coffee shops, etc.),  
183 and public areas (parks, beaches, etc.) was deteriorated. School closure served as a warning sign  
184 that indicated the severity of the outbreak. Therefore, citizens became more cautious in their  
185 mobility and avoided going out to reduce the risk of catching COVID-19. Moreover, the  
186 Japanese government emphasized the importance of social distancing along with the  
187 announcement of school closure. The decrease in mobility of retail and recreation, grocery and  
188 pharmacy, and parks demonstrated the compliance, responsibility, and awareness of Japanese  
189 citizens in respecting the recommendations of the government.

190 Regarding public transportation, starting from March 2<sup>nd</sup>, a significant reduction in the volume of  
191 Japanese citizens using buses, railways, and subways was identified. Regardless of the normal  
192 operation of transit stations in Japan, this decline was therefore due to the absence of students  
193 who account for a large volume of daily customers. Additionally, recommendations from the  
194 government to limit the translocation and the travel to other prefectures also contributed to this  
195 mobility reduction. Furthermore, the mobility of Japanese citizens in workplaces decreased from  
196 the moment of two weeks after school closure. The requirement of working from home was  
197 adopted by the government and private sector companies to ensure the safety of employees and  
198 mitigate the spread of the virus by limiting contacts among employees. Besides the fact that  
199 employees were encouraged to work at home via online platforms and therefore reducing direct  
200 contacts, school closure also imposed parents to stay at home to take care of their children.  
201 Moreover, due to COVID-19, nearly 25 million jobs were lost, resulting in an increase of  
202 worldwide unemployment rate from 4.936% to 5.644%<sup>16</sup>. Along with the transition to



203 telecommuting, the increase in the rate of unemployment during the pandemic contributed to the  
204 reduction of mobility in workplaces.

205 Finally, as expected, the results showed that the mobility trend in residential after school closure  
206 significantly increased compared to the prior period. Since students no longer went to schools,  
207 parents might take some days off or even quit jobs in order to take care of their children. Hence,  
208 school closure not only increased mobility in residential of students and educators but also those  
209 who did not work at schools. In addition, recommendations from the government to restrict the  
210 translocation encouraged Japanese citizens to stay at home. Also, in an effort to limit social  
211 contacts, telecommuting began replacing the conventional working strategies, thus leading to an  
212 increase in the number of people staying at home.

213 Besides, we acknowledge that our study has several limitations. Since Google COVID-19  
214 Community Mobility Reports only recorded the location history of people who had a Google  
215 account and enabled the setting for location history, data of our study cannot represent the  
216 mobility trend of the whole Japanese population. Additionally, evaluation of the influence of  
217 school closure was restricted within four weeks since its application. Thus, this physical  
218 distancing measure requires a monthly assessment to identify its long-term potency.

219 In conclusion, the impacts of school closure could diversely vary among countries with different  
220 population structures and various cultural identities. By using the COVID-19 Community  
221 Mobility Report from Google, our study quantified the short-term effects of school closure on  
222 the mobility of Japanese citizens for retail and recreation, grocery and pharmacy, parks, transit  
223 stations, workplace, and residential and determined a significant change in the mobility trend of  
224 Japanese citizens before and after school closure. In Japan, even though the policies and the  
225 control measures of the government to manage the outbreak just stopped at the level of strong  
226 recommendation but not compulsion, these data reflected the responsibility and the awareness of  
227 Japanese citizens to a certain degree. While the efficacy of school closure is still debatable, its  
228 capability to control the pandemic cannot be ignored. Closing schools had reduced the social  
229 interactions among people and had eventually mitigated seasonal and pandemic influenza<sup>7</sup>.  
230 Therefore, it is highly recommended to close schools nationwide during the COVID-19  
231 pandemic because school closure is an effective strategy to reduce the mobility of people, thus  
232 preventing human-to-human transmission.



233 **Acknowledgements**

234 None.

235 **Competing Interests**

236 The authors declare that they have no conflict of interests.

237 **Funding**

238 No funding.

239 **Authors' contributions**

240 NHN analyzed data and drafted the manuscript. APNN extracted data and drafted the manuscript.  
241 BTDL, AGG, ASMAA, AS, and AGP extracted data. VDK provided guidance on using the  
242 software to extract data. NTH organized the work and verified all data and the manuscript. All  
243 authors read and approved the final manuscript.

244

245 **References**

- 246 1. He F, Deng Y, Li W. Coronavirus disease 2019: What we know? *J Med Virol*.  
247 2020;92(7):719-725. doi:10.1002/jmv.25766
- 248 2. World Health Organization (WHO) (2020) Novel Coronavirus (2019-nCoV). Situation  
249 report -51. 11 March 2020. Available:  
250 [https://www.who.int/docs/default-source/coronaviruse/situation-reports/20200311-sitrep-](https://www.who.int/docs/default-source/coronaviruse/situation-reports/20200311-sitrep-51-covid-19.pdf?sfvrsn=1ba62e57_10)  
251 [51-covid-19.pdf?sfvrsn=1ba62e57\\_10](https://www.who.int/docs/default-source/coronaviruse/situation-reports/20200311-sitrep-51-covid-19.pdf?sfvrsn=1ba62e57_10) Accessed: 18 May 2020.
- 252 3. Shereen MA, Khan S, Kazmi A, Bashir N, Siddique R. COVID-19 infection: Origin,  
253 transmission, and characteristics of human coronaviruses. *J Adv Res*. 2020;24:91-98.  
254 doi:10.1016/j.jare.2020.03.005
- 255 4. Centers for Disease Control and Prevention (CDC) (2020). What you should know about  
256 COVID-19 to protect yourself and others. Available:  
257 <https://www.cdc.gov/coronavirus/2019-ncov/downloads/2019-ncov-factsheet.pdf>.
- 258 5. Centers for Disease Control and Prevention (CDC) (2017). Community Mitigation  
259 Guidelines to Prevent Pandemic Influenza — United States, 2017. Available:  
260 <https://www.cdc.gov/mmwr/volumes/66/rr/rr6601a1.htm>.
- 261 6. Centers for Disease Control and Prevention (CDC) (2020). Similarities and Differences  
262 between Flu and COVID-19. Available: [https://www.cdc.gov/flu/symptoms/flu-vs-](https://www.cdc.gov/flu/symptoms/flu-vs-covid19.htm)  
263 [covid19.htm](https://www.cdc.gov/flu/symptoms/flu-vs-covid19.htm).

- 264 7. Litvinova M, Liu Q-H, Kulikov ES, Ajelli M. Reactive school closure weakens the network  
265 of social interactions and reduces the spread of influenza. *Proc Natl Acad Sci U S A*.  
266 2019;116(27):13174-13181. doi:10.1073/pnas.1821298116
- 267 8. World Health Organization (WHO) (2020). Key Messages and Actions for COVID-19  
268 Prevention and Control in Schools (March 2020). Available at:  
269 [https://www.who.int/docs/default-source/coronaviruse/key-messages-and-actions-for-](https://www.who.int/docs/default-source/coronaviruse/key-messages-and-actions-for-covid-19-prevention-and-control-in-schools-march-2020.pdf?sfvrsn=baf81d52_4)  
270 [covid-19-prevention-and-control-in-schools-march-2020.pdf?sfvrsn=baf81d52\\_4](https://www.who.int/docs/default-source/coronaviruse/key-messages-and-actions-for-covid-19-prevention-and-control-in-schools-march-2020.pdf?sfvrsn=baf81d52_4).
- 271 9. Viner RM, Russell SJ, Croker H, et al. School closure and management practices during  
272 coronavirus outbreaks including COVID-19: a rapid systematic review. *The Lancet Child &*  
273 *Adolescent Health*. 2020;4(5):397-404. doi:10.1016/S2352-4642(20)30095-X
- 274 10. Japanese Ministry of Health, Labour, and Welfare (2020). Update of the new COVID-19  
275 cases (233-241 cases). Available: [https://www.mhlw.go.jp/stf/newpage\\_09900.html](https://www.mhlw.go.jp/stf/newpage_09900.html).
- 276 11. Japanese Ministry of Health, Labour, and Welfare (2020). Kato Ministerial conference  
277 overview. Available:  
278 [https://www.mhlw.go.jp/stf/kaiken/daijin/0000194708\\_00218.html?fbclid=IwAR3gjKxHe](https://www.mhlw.go.jp/stf/kaiken/daijin/0000194708_00218.html?fbclid=IwAR3gjKxHeNnhrX5H-tSqqEIIkACzrm671DK_HeNRqQeJdVeIqAPbPt8AQYw)  
279 [NnhrX5H-tSqqEIIkACzrm671DK\\_HeNRqQeJdVeIqAPbPt8AQYw](https://www.mhlw.go.jp/stf/kaiken/daijin/0000194708_00218.html?fbclid=IwAR3gjKxHeNnhrX5H-tSqqEIIkACzrm671DK_HeNRqQeJdVeIqAPbPt8AQYw).
- 280 12. Google COVID-19 Community Mobility Reports. Available at:  
281 <https://www.google.com/covid19/mobility/>.
- 282 13. Esposito S, Principi N. School Closure During the Coronavirus Disease 2019 (COVID-19)  
283 Pandemic: An Effective Intervention at the Global Level? *JAMA Pediatrics*. Published  
284 online May 13, 2020. doi:10.1001/jamapediatrics.2020.1892
- 285 14. Prem K, Liu Y, Russell TW, et al. The effect of control strategies to reduce social mixing  
286 on outcomes of the COVID-19 epidemic in Wuhan, China: a modelling study. *Lancet*  
287 *Public Health*. 2020;5(5):e261-e270. doi:10.1016/S2468-2667(20)30073-6
- 288 15. Sharma A, U V, Dong V, et al. Universal checklist for COVID-19 control measures:  
289 consensus via a Delphi method. *Clin Med*. 2021;21(Suppl 2):25. doi:10.7861/clinmed.21-2-  
290 s25
- 291 16. Kawohl W, Nordt C. COVID-19, unemployment, and suicide. *The Lancet Psychiatry*.  
292 2020;7(5):389-390. doi:10.1016/S2215-0366(20)30141-3

293

## 294 **Figure legends**

295 Figure 1: Mobility trend in retail and recreation of Japanese citizens from February 24<sup>th</sup> to March  
296 29<sup>th</sup>.

297 Figure 2: Mobility trend in grocery and pharmacy of Japanese citizens from February 24<sup>th</sup> to  
298 March 29<sup>th</sup>.

299 Figure 3: Mobility trend in parks of Japanese citizens from February 24<sup>th</sup> to March 29<sup>th</sup>.

300 Figure 4: Mobility trend in transit stations of Japanese citizens from February 24<sup>th</sup> to March 29<sup>th</sup>.

301 Figure 5: Mobility trend in the workplace of Japanese citizens from February 24<sup>th</sup> to March 29<sup>th</sup>.

302 Figure 6: Mobility trend in residential of Japanese citizens from February 24<sup>th</sup> to March 29<sup>th</sup>.



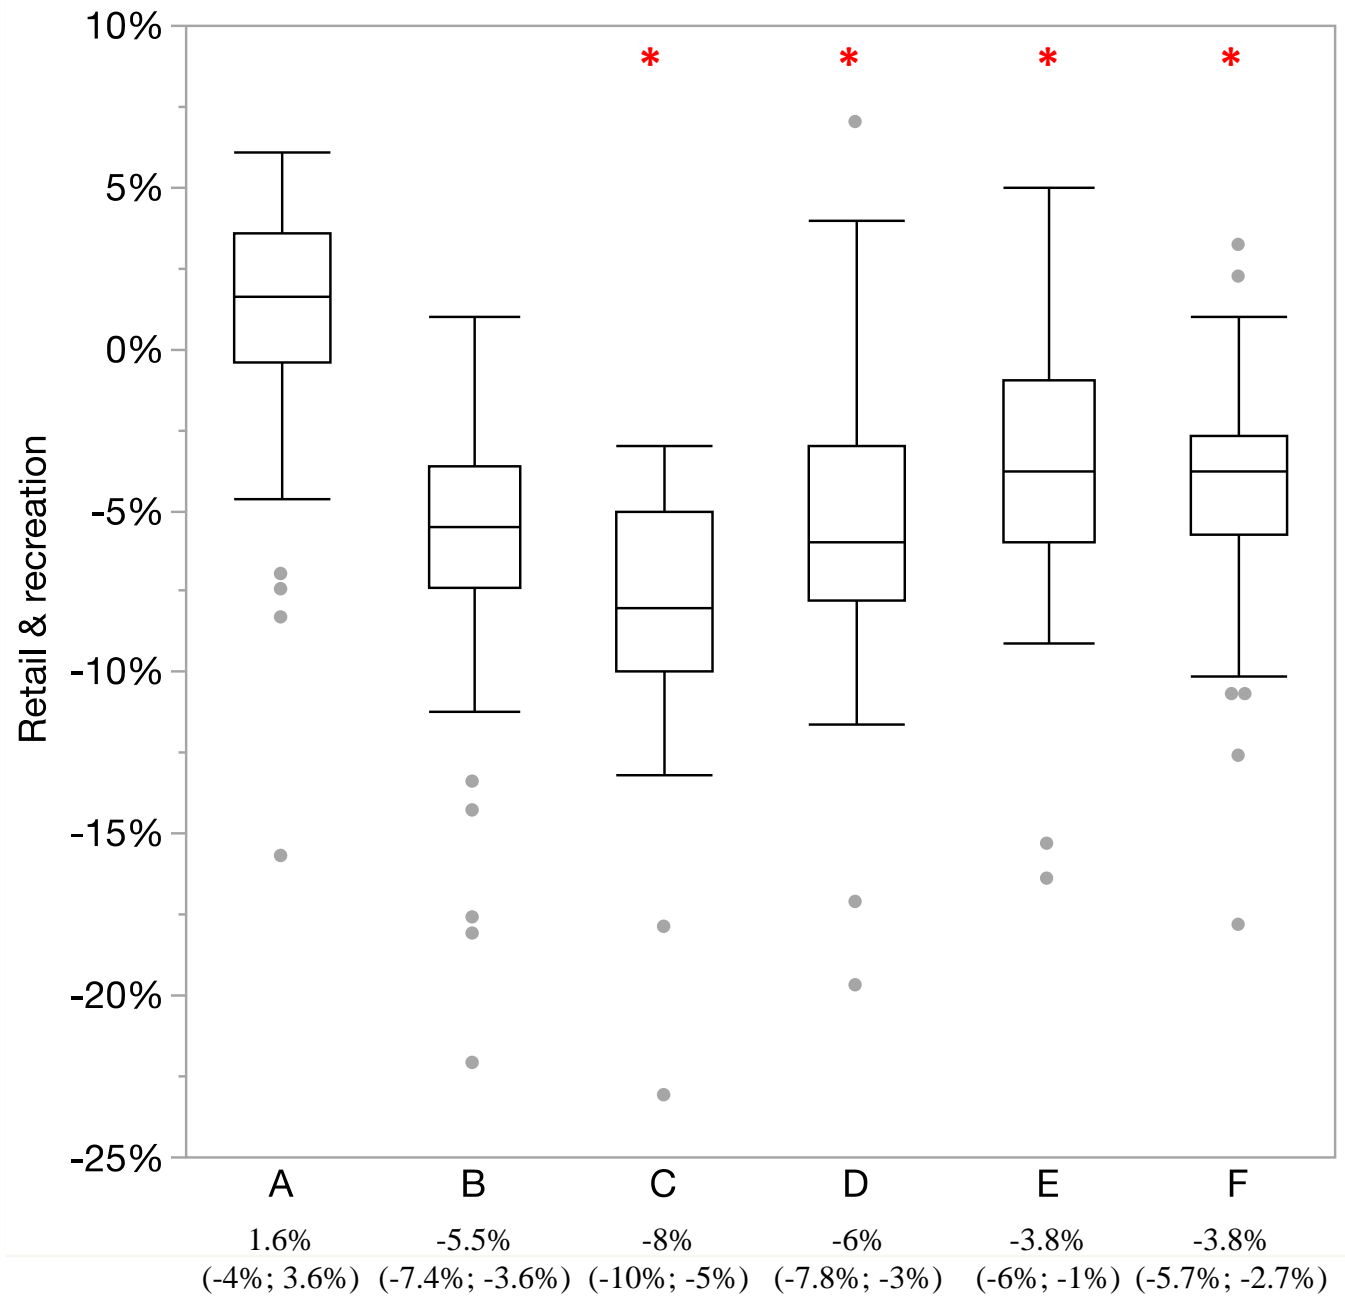

Period of time

A: Feb 24 - Mar 1 (1 week before school closure)

B: Mar 2 (On date of school closure)

C: Mar 2 - Mar 8 (1 week after school closure )

D: Mar 9 - Mar 15 (2 weeks after school closure )

E: Mar 16 - Mar 22 (3 weeks after school closure )

F: Mar 23 - Mar 29 (4 weeks after school closure )

\* p<0.005 in compared to period A

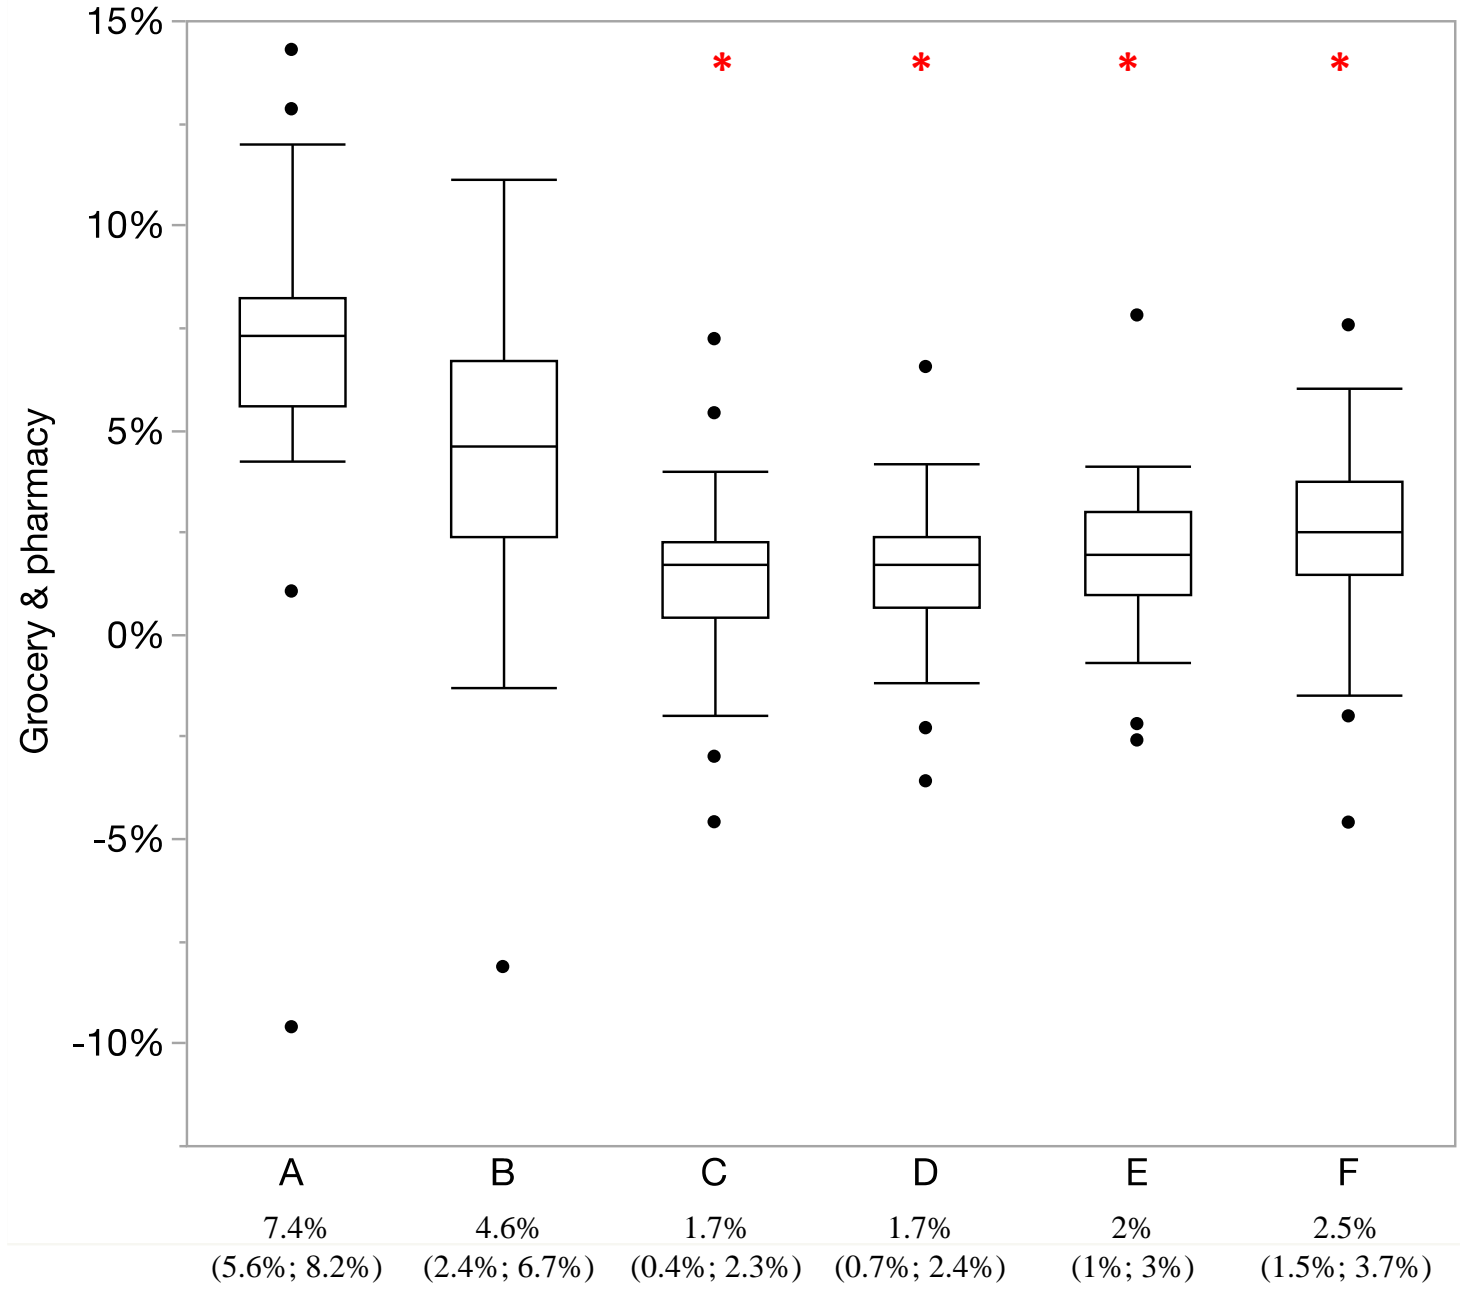

Period of time

A: Feb 24 - Mar 1 (1 week before school closure)

B: Mar 2 (On date of school closure)

C: Mar 2 - Mar 8 (1 week after school closure)

D: Mar 9 - Mar 15 (2 weeks after school closure)

E: Mar 16 - Mar 22 (3 weeks after school closure)

F: Mar 23 - Mar 29 (4 weeks after school closure)

\*  $p < 0.005$  in compared to period A

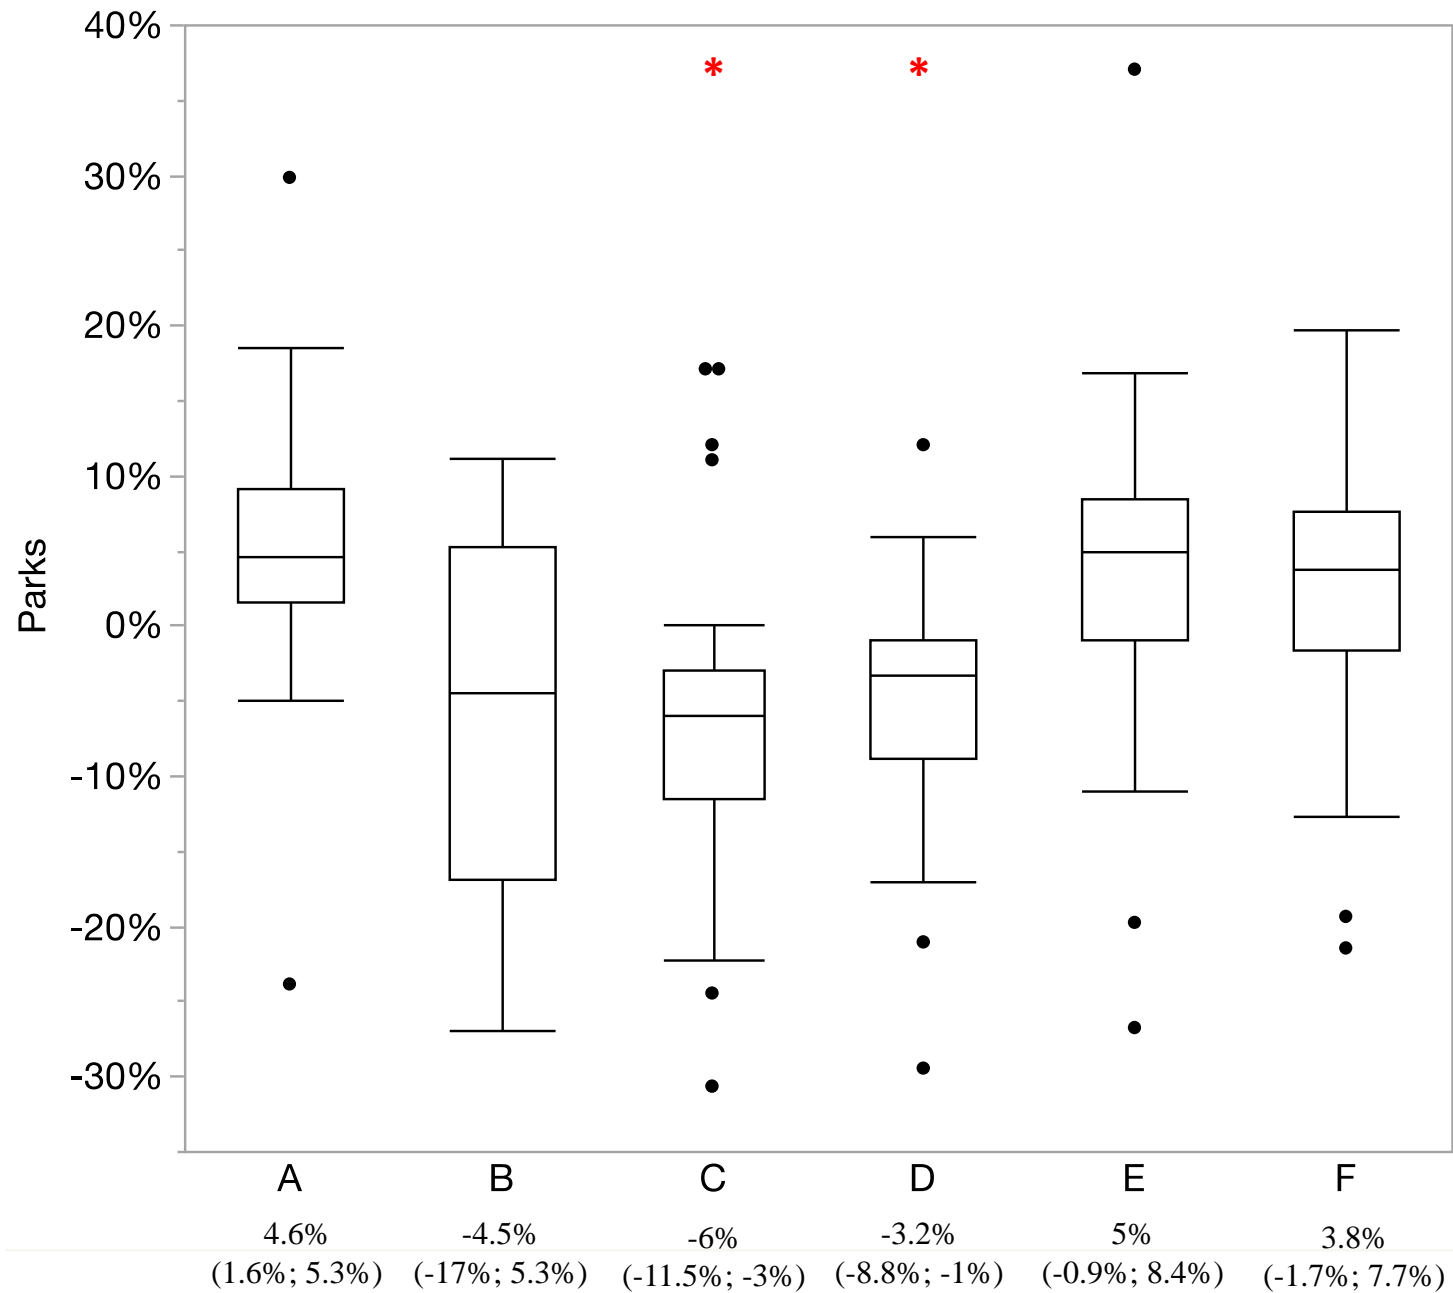

Period of time

A: Feb 24 - Mar 1 (1 week before school closure)

B: Mar 2 (On date of school closure)

C: Mar 2 - Mar 8 (1 week after school closure )

D: Mar 9 - Mar 15 (2 weeks after school closure )

E: Mar 16 - Mar 22 (3 weeks after school closure )

F: Mar 23 - Mar 29 (4 weeks after school closure )

\*  $p < 0.005$  in compared to period A



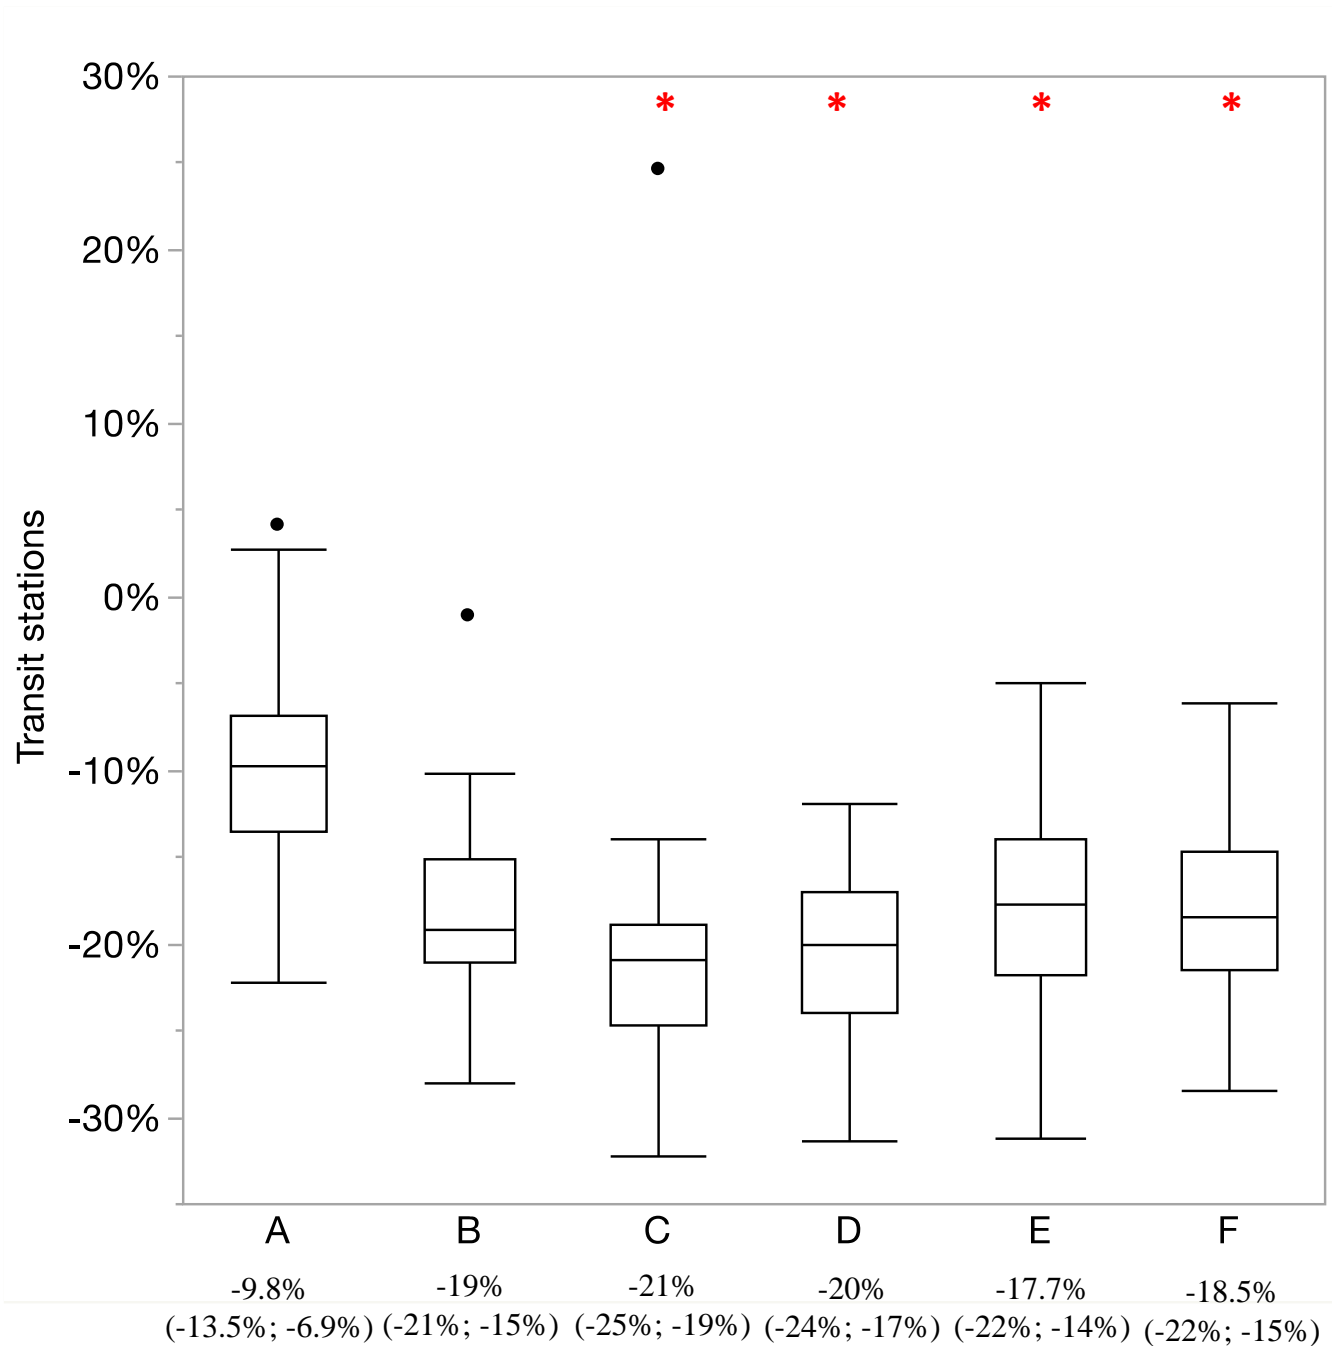

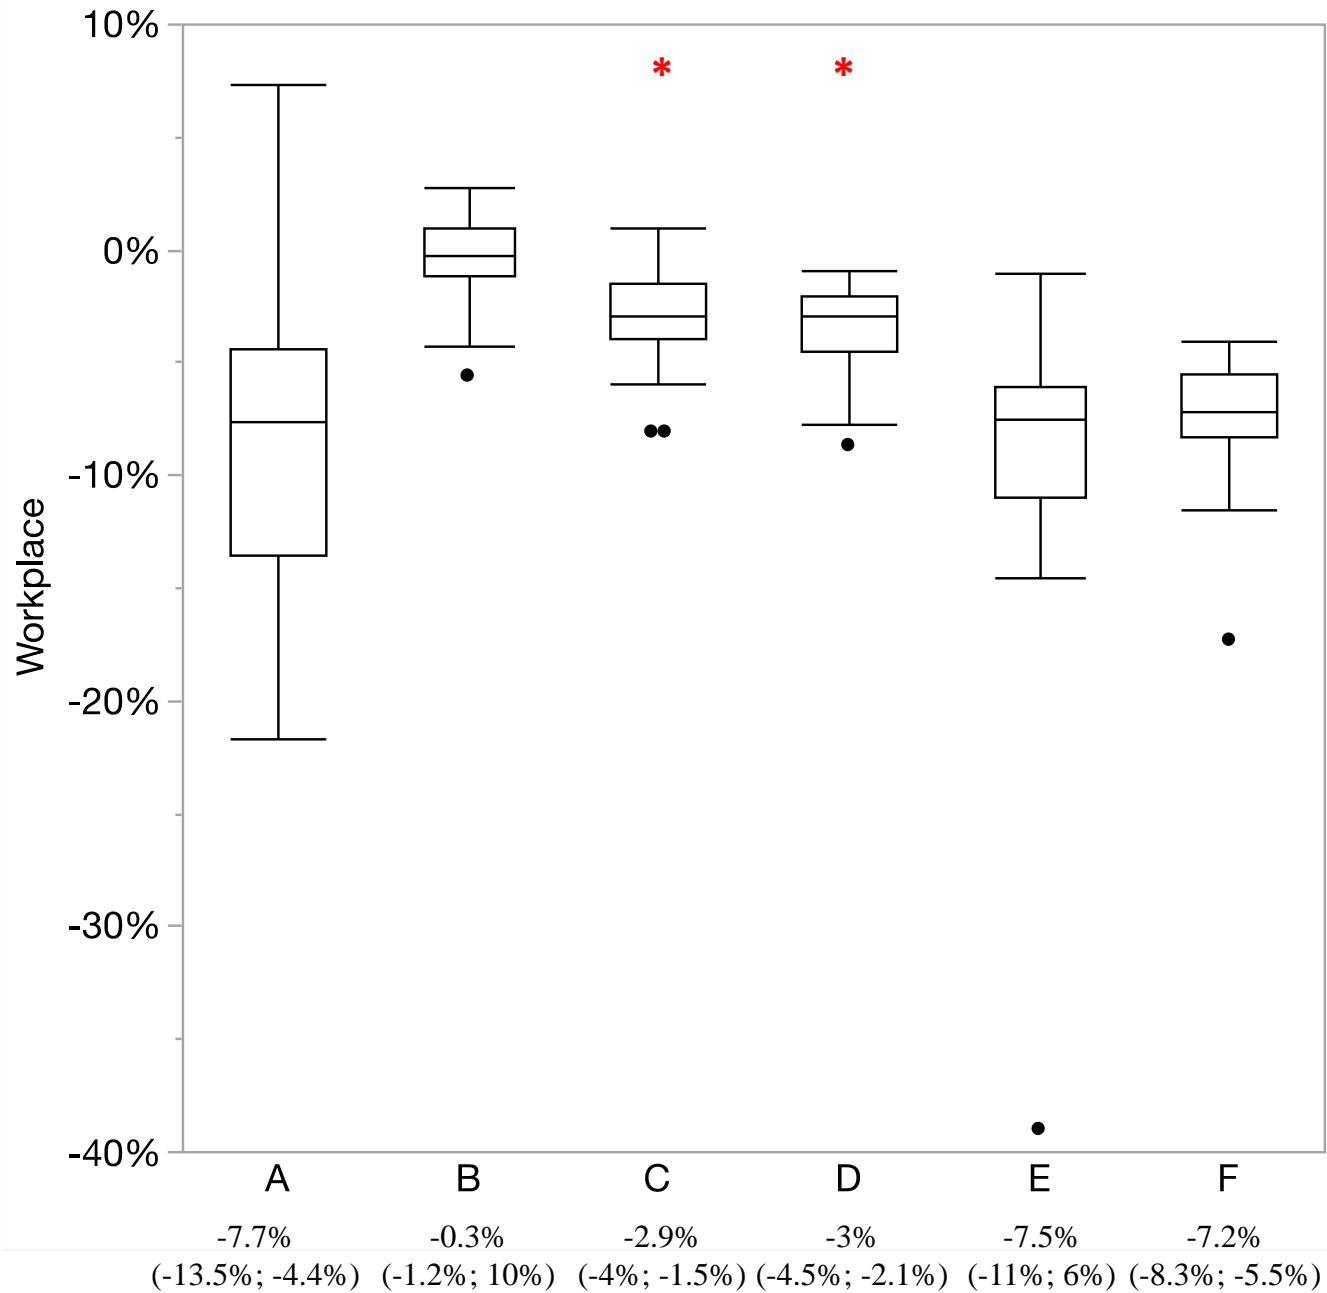

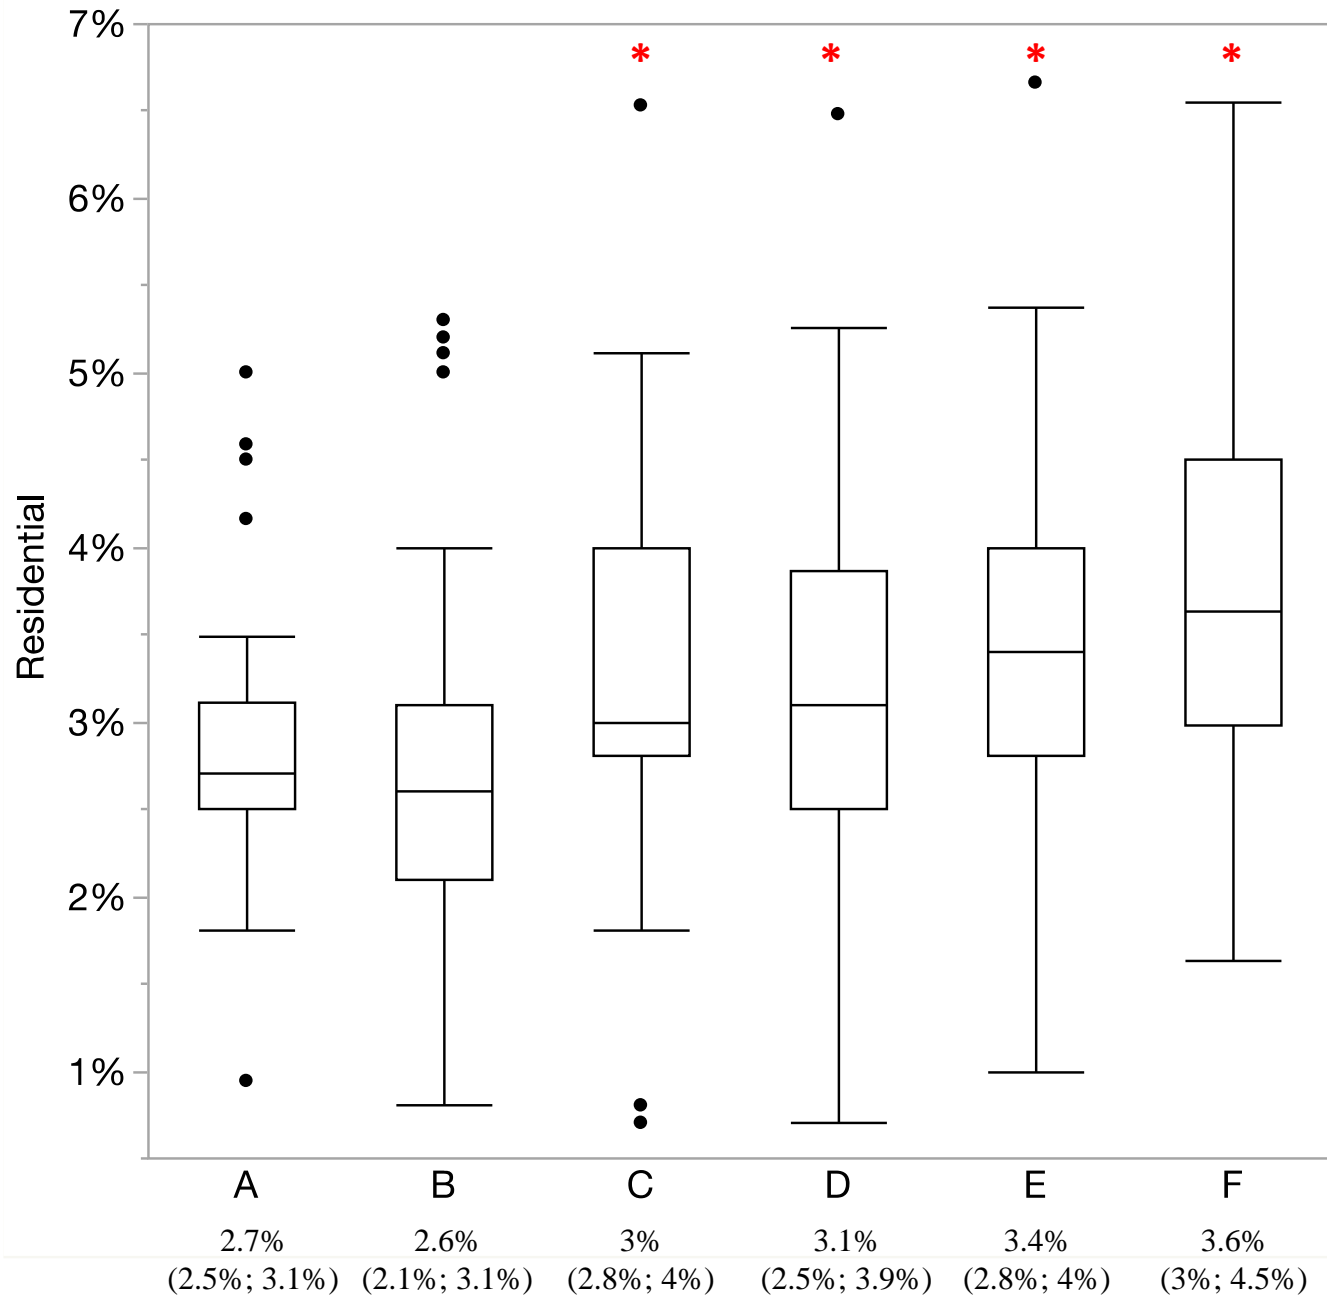

Period of time

A: Feb 24 - Mar 1 (1 week before school closure)

B: Mar 2 (On date of school closure)

C: Mar 2 - Mar 8 (1 week after school closure)

D: Mar 9 - Mar 15 (2 weeks after school closure)

E: Mar 16 - Mar 22 (3 weeks after school closure)

F: Mar 23 - Mar 29 (4 weeks after school closure)

\*  $p < 0.005$  in compared to period A
